# Supplementary material
Source: PubMed Central journal article supplement (PMC5842905)
Supplement: 10.4085_334-16.s1.pdf [file 10.4085_334-16.s1.pdf]

**Supplemental Table.** Description of Study Characteristics and Methodological Quality

| Authors (year)                       | Landing Task                       | Injured Group Included, n                                                          | Sex (Female/Male)                                                            | Age, y (Mean ± SD)                                                                            | Time Since Surgery                                                                             | Graft Type (n)                                                                                               | Comparison Group, n | Sex (Female/Male) | Age, y (Mean ± SD) | Modified Downs and Black Score (0–15) |
|--------------------------------------|------------------------------------|------------------------------------------------------------------------------------|------------------------------------------------------------------------------|-----------------------------------------------------------------------------------------------|------------------------------------------------------------------------------------------------|--------------------------------------------------------------------------------------------------------------|---------------------|-------------------|--------------------|---------------------------------------|
| Dai et al <sup>33</sup> (2014)       | Double-limb stop jump with 35° cut | 23                                                                                 | 14/9                                                                         | 16.5 ± 1.3                                                                                    | 6.2 ± 0.6 mo                                                                                   | Semitendinosus-gracilis autograft (23)                                                                       | NA                  | NA                | NA                 | 12                                    |
| Decker et al <sup>34</sup> (2002)    | Double-limb drop jump 60-cm box    | 11                                                                                 | NA                                                                           | 27.3 <sup>a</sup>                                                                             | >12.0 mo                                                                                       | Semitendinosus-gracilis autograft (11)                                                                       | Healthy = 11        | NA                | 26.9 <sup>a</sup>  | 9                                     |
| Delahunt et al <sup>35</sup> (2012)  | Single-limb 45° diagonal jump      | 13                                                                                 | 13/0                                                                         | 23.7 ± 3.1                                                                                    | 4.4 y                                                                                          | Semitendinosus-gracilis autograft (13)                                                                       | Healthy = 16        | 16/0              | 20.8 ± 1.2         | 10                                    |
| Delahunt et al <sup>36</sup> (2012)  | Double-limb drop jump 35-cm box    | 14                                                                                 | 14/0                                                                         | 23.0 ± 3.4                                                                                    | 4.4 y                                                                                          | Semitendinosus-gracilis autograft (14)                                                                       | Healthy = 14        | 14/0              | 20.8 ± 1.1         | 11                                    |
| Ernst et al <sup>37</sup> (2000)     | Single-limb vertical jump          | 20                                                                                 | 6/14                                                                         | 23.5 ± 3.7                                                                                    | 9.8 ± 2.3 mo                                                                                   | Bone-patellar tendon-bone autograft (20)                                                                     | Healthy = 20        | 6/14              | 22.7 ± 4.2         | 11                                    |
| Goitis et al <sup>38</sup> (2013)    | Double-limb drop jump 40-cm box    | 20                                                                                 | 0/20                                                                         | 27.1 ± 3.4                                                                                    | 26.0 mo (range = 25.0–28.0 mo)                                                                 | Bone-patellar tendon-bone autograft (20)                                                                     | NA                  | NA                | NA                 | 10                                    |
| Goerger et al <sup>39</sup> (2014)   | Double-limb drop jump 30-cm box    | 12                                                                                 | 4/8                                                                          | 18.6 ± 0.5                                                                                    | 1.8 ± 0.6 y                                                                                    | NA                                                                                                           | Healthy = 39        | 19/20             | 18.5 ± 0.5         | 11                                    |
| Miranda et al <sup>40</sup> (2013)   | Single-limb 45° diagonal jump      | 10                                                                                 | 0/42                                                                         | 27.0 ± 1.7                                                                                    | NA                                                                                             | Bone-patellar tendon-bone autograft (7)<br>Semitendinosus-gracilis autograft (2)                             | Healthy = 10        | 5/5               | 25.2 ± 1.6         | 9                                     |
| Mohammadi et al <sup>41</sup> (2013) | Single-limb drop jump 40-cm box    | Bone-patellar tendon-bone autograft = 21<br>Semitendinosus-gracilis autograft = 21 | 0/42                                                                         | Bone-patellar tendon-bone = 24.9 ± 2.8<br>Semitendinosus-gracilis = 25.2 ± 2.4                | Bone-patellar tendon-bone = 8.1 ± 1.4 mo<br>Semitendinosus-gracilis = 8.2 ± 1.8 mo             | Bone-patellar tendon-bone autograft (21)<br>Semitendinosus-gracilis autograft (21)                           | Healthy = 21        | 0/21              | 25.4 ± 2.9         | 13                                    |
| Nyland et al <sup>42</sup> (2010)    | Single-limb vertical jump          | 70                                                                                 | 35/35                                                                        | NA                                                                                            | 5.3 ± 3.0 y                                                                                    | Peroneal autograft (38)<br>Bone-patellar tendon-bone autograft (25)<br>Semitendinosus-gracilis autograft (7) | NA                  | NA                | NA                 | 10                                    |
| Nyland et al <sup>43</sup> (2013)    | Single-limb vertical jump          | 70                                                                                 | Highly active = 10/10<br>Moderate active = 12/12<br>Sometimes active = 15/11 | Highly active = 26.5 ± 9.4<br>Moderate active = 29.8 ± 11.4<br>Sometimes active = 33.1 ± 13.5 | Highly active = 4.6 ± 3.0 y<br>Moderate active = 5.7 ± 2.8 y<br>Sometimes active = 5.4 ± 3.1 y | Allograft (70)                                                                                               | NA                  | NA                | NA                 | 11                                    |
| Ortiz et al <sup>44</sup> (2008)     | Single-limb drop jump 30-cm box    | 14                                                                                 | 14/0                                                                         | 25.4 ± 3.1                                                                                    | 7.2 ± 4.2 y                                                                                    | Bone-patellar tendon-bone autograft (9)<br>Semitendinosus-gracilis autograft (3)<br>Allograft (2)            | Healthy = 15        | 15/0              | 24.6 ± 2.6         | 10                                    |
| Orishimo et al <sup>45</sup> (2010)  | Single-limb hop for distance       | 13                                                                                 | 4/9                                                                          | 33.0 ± 10.0                                                                                   | 7.2 ± 2.7 mo                                                                                   | Bone-patellar tendon-bone autograft (13)                                                                     | NA                  | NA                | NA                 | 9                                     |
| Paterno et al <sup>46</sup> (2007)   | Double-limb drop jump 31-cm box    | 14                                                                                 | 14/0                                                                         | 20.7 ± 20.5                                                                                   | 27.4 ± 13.8 mo                                                                                 | Bone-patellar tendon-bone autograft (14)                                                                     | Healthy = 18        | 18/0              | 20.0 ± 1.2         | 10                                    |

|                                         |                                 |    |       |            |                |                                                                                                     |              |       |            |    |
|-----------------------------------------|---------------------------------|----|-------|------------|----------------|-----------------------------------------------------------------------------------------------------|--------------|-------|------------|----|
| Paterno et al <sup>47</sup><br>(2011)   | Double-limb drop jump 31-cm box | 56 | 35/21 | 16.4 ± 3.0 | 6.9 ± 1.7 mo   | Bone-patellar tendon-bone autograft (25)<br>Semitendinosus-gracilis autograft (27)<br>Allograft (4) | Healthy = 42 | 29/13 | 16.8 ± 2.3 | 13 |
| Sato et al <sup>48</sup><br>(2013)      | Double-limb drop jump 30-cm box | 7  | 4/3   | 21.3 ± 4.9 | 14.3 ± 1.8 mo  | Semitendinosus-gracilis autograft (7)                                                               | NA           | NA    | NA         | 9  |
| Tsai et al <sup>49</sup><br>(2012)      | Single-limb drop jump 25-cm box | 10 | 10/0  | 25.3 ± 2.4 | 36.2 ± 18.5 mo | Bone-patellar tendon-bone autograft (3)<br>Allograft (7)                                            | Healthy = 10 | 10/0  | 24.9 ± 1.7 | 10 |
| Tsai and Powers <sup>50</sup><br>(2013) | Single-limb drop jump 25-cm box | 10 | 10/0  | 25.3 ± 2.5 | 36.2 ± 18.5 mo | Bone-patellar tendon-bone autograft (3)<br>Allograft (7)                                            | NA           | NA    | NA         | 11 |
| Vairo et al <sup>51</sup><br>(2008)     | Single-limb drop jump 30-cm box | 14 | 9/5   | 22.5 ± 4.1 | 21.4 ± 10.7 mo | Semitendinosus-gracilis autograft (14)                                                              | Healthy = 14 | 9/5   | 22.8 ± 3.5 | 13 |
| Webster et al <sup>52</sup><br>(2012)   | Single-limb drop jump 30-cm box | 15 | 0/15  | 27.0 ± 5.9 | 67.0 ± 8.4 wk  | Semitendinosus-gracilis autograft (15)                                                              | Healthy = 11 | 0/11  | 22.6 ± 2.6 | 13 |

Abbreviation: NA, not applicable.

<sup>a</sup> The SD was not provided.
